# Supplementary material for: The Biofuel Feedstock Genomics Resource: a web-based portal and database to enable functional genomics of plant biofuel feedstock species
Source: Oxford University Press journal article supplement (doi:10.1093/database/bar061), 2012-01-01
Supplement: bar061_Supplementary_Data.zip [file Table_S1.xlsx]

## Sheet: Sheet1
Table S1. Summary of Sequences Mapped to the KEGG Starch and Sucrose Synthesis Pathway.
Species	Number Sequences Assigned to Starch and Sucrose Synthesis Pathway	Number Distinct KEGG Orthologs Matched in the Starch and Sucrose Synthesis Pathway
Agrostis stolonifera	50	19
Arabidopsis thaliana	458	32
Avena barbata	206	32
Avena sativa	114	26
Brachypodium distachyon	424	34
Cenchrus ciliaris	129	28
Cryptomeria japonica	235	32
Cynodon dactylon	84	28
Eragrostis curvula	66	17
Festuca arundinacea	256	35
Festuca pratensis	262	36
Helianthus annuus	614	32
Helianthus argophyllus	221	29
Helianthus ciliaris	233	32
Helianthus exilis	229	32
Helianthus paradoxus	195	28
Helianthus petiolaris	174	31
Helianthus tuberosus	325	33
Hordeum vulgare	1080	34
Leymus cinereus x Leymus triticoides	216	27
Medicago sativa	46	20
Medicago truncatula	535	33
Oryza sativa	610	32
Panicum virgatum	948	34
Picea engelmannii x Picea glauca	123	28
Picea glauca	457	34
Picea sitchensis	232	33
Pinus contorta	141	29
Pinus pinaster	144	27
Pinus taeda	421	37
Populus deltoides	89	24
Populus euphratica	86	28
Populus nigra	290	31
Populus tremula	135	29
Populus tremula x Populus alba	108	24
Populus tremula x Populus tremuloides	230	30
Populus tremuloides	81	24
Populus trichocarpa	642	34
Populus trichocarpa x Populus deltoides	154	29
Populus trichocarpa x Populus nigra	79	27
Populus x canadensis	38	17
Pseudoroegneria spicata	122	28
Pseudotsuga menziesii var. menziesii	32	17
Quercus petraea	71	23
Quercus robur	193	31
Saccharum officinarum	1323	32
Secale cereale	66	22
Sorghum bicolor	439	34
Sorghum propinquum	122	28
Triticum aestivum	1405	35
Triticum monococcum	70	21
Triticum turgidum subsp. durum	84	22
Vitis vinifera	379	33
Zea mays	695	34
