# Supplementary material for: The Biofuel Feedstock Genomics Resource: a web-based portal and database to enable functional genomics of plant biofuel feedstock species
Source: Oxford University Press journal article supplement (doi:10.1093/database/bar061), 2012-01-01
Supplement: bar061_Supplementary_Data.zip [file Table_S2.xlsx]

## Sheet: snp_ssr_results.txt
Table S2. SNP and SSR Markers Found in Gene and Transcript Assembly Sequences.
Species	Number Sequences with SNPs	Number SNPs	Number Sequences with SSRs	Number SSRs
Agrostis stolonifera	97	263	990	1318
Arabidopsis thaliana	NA1	NA1	8959	11674
Avena barbata	1412	6501	2644	3155
Avena sativa	432	1880	907	979
Brachypodium distachyon	NA1	NA1	3790	4499
Cenchrus ciliaris	418	1673	2315	3087
Cryptomeria japonica	1470	3369	1144	1259
Cynodon dactylon	211	820	2250	3649
Eragrostis curvula	16	31	1821	3415
Festuca arundinacea	1355	6782	2536	2893
Festuca pratensis	2758	9714	4889	9781
Helianthus annuus	3518	13098	7827	9691
Helianthus argophyllus	608	1702	1810	2076
Helianthus ciliaris	281	979	1856	2173
Helianthus exilis	826	2116	2459	2835
Helianthus paradoxus	292	727	2259	2667
Helianthus petiolaris	796	3840	2215	2810
Helianthus tuberosus	1272	5427	2971	3491
Hordeum vulgare	NA2	NA2	17151	22633
Leymus cinereus x Leymus triticoides	753	3470	3002	3374
Medicago sativa	118	393	518	591
Medicago truncatula	2408	5155	8990	11315
Oryza sativa	NA1	NA1	21546	33488
Panicum virgatum	17689	93319	14541	17386
Picea engelmannii x Picea glauca	643	1787	1091	1218
Picea glauca	12085	72252	4571	5370
Picea sitchensis	4922	19749	4270	5143
Pinus contorta	1650	4469	764	822
Pinus pinaster	464	1309	663	710
Pinus taeda	8147	38892	3182	3630
Populus deltoides	206	533	1336	1606
Populus euphratica	175	491	1010	1233
Populus nigra	413	1090	5641	6663
Populus tremula	582	1886	1877	2541
Populus tremula x Populus alba	432	1445	2230	2957
Populus tremula x Populus tremuloides	1284	3557	3344	4606
Populus tremuloides	348	1091	327	382
Populus trichocarpa	NA1	NA1	8745	11254
Populus trichocarpa x Populus deltoides	1188	4411	4069	5161
Populus trichocarpa x Populus nigra	497	2027	1926	2317
Populus x canadensis	209	776	807	964
Pseudoroegneria spicata	1166	3651	2462	2833
Pseudotsuga menziesii var. menziesii	212	507	498	539
Quercus petraea	254	664	1156	1404
Quercus robur	1041	3532	3954	5253
Saccharum officinarum	7502	27166	18954	22078
Secale cereale	105	274	583	665
Sorghum bicolor	NA1	NA1	5435	6933
Sorghum propinquum	165	420	989	1126
Triticum aestivum	NA2	NA2	45460	56939
Triticum monococcum	99	227	743	816
Triticum turgidum subsp. durum	215	634	863	980
Vitis vinifera	NA1	NA1	1531	1736
Zea mays	NA1	NA1	13670	18535
1SNP analysis was not performed on genes from sequenced genomes.
2SNP analysis was not performed on transcript assemblies from Hordeum vulgare, Medicago truncatula, Picea sitchensis Pseudotsuga menziesii var. menziesii and Triticum aestivum because the necessary multiple sequence alignment files were not available from PlantGDB.
