# Supplementary material for: The Biofuel Feedstock Genomics Resource: a web-based portal and database to enable functional genomics of plant biofuel feedstock species
Source: Oxford University Press journal article supplement (doi:10.1093/database/bar061), 2012-01-01
Supplement: bar061_Supplementary_Data.zip [file Table_S3.xlsx]

## Sheet: Table_S3.txt
Table S3. Phenylalanine ammonia-lyase Sequences from the Monocot Orthologous Groups Analysis.
Cluster ID	Cluster Size	Species1	Sequence ID	Length Predicted Protein	Functional Annotation
cluster 59	127	Agrostis stolonifera	PUT-173a-Agrostis_stolonifera-6455	208	Phenylalanine ammonia-lyase
cluster 59	127	Agrostis stolonifera	PUT-173a-Agrostis_stolonifera-8731	218	Phenylalanine ammonia-lyase
cluster 59	127	Arabidopsis thaliana	AT3G10340.1	707	pal4 (Phe ammonia lyase 4); phenylalanine ammonia-lyase
cluster 59	127	Arabidopsis thaliana	AT3G53260.1	717	pal2 (Phe ammonia lyase 2); phenylalanine ammonia-lyase
cluster 59	127	Arabidopsis thaliana	AT2G37040.1	726	pal1 (Phe ammonia lyase 1); phenylalanine ammonia-lyase
cluster 59	127	Avena barbata	PUT-173a-Avena_barbata-165	267	Phenylalanine ammonia-lyase
cluster 59	127	Avena barbata	PUT-173a-Avena_barbata-131	336	Phenylalanine ammonia-lyase
cluster 59	127	Avena barbata	PUT-173a-Avena_barbata-14299	368	Phenylalanine ammonia-lyase
cluster 59	127	Avena barbata	PUT-173a-Avena_barbata-7287	383	Phenylalanine ammonia-lyase
cluster 59	127	Avena barbata	PUT-173a-Avena_barbata-17765	590	Phenylalanine ammonia-lyase
cluster 59	127	Avena sativa	PUT-173a-Avena_sativa-8762	112	Phenylalanine ammonia-lyase
cluster 59	127	Brachypodium distachyon	Bradi3g49250.2	708	Phenylalanine ammonia-lyase
cluster 59	127	Brachypodium distachyon	Bradi3g49250.1	708	Phenylalanine ammonia-lyase
cluster 59	127	Brachypodium distachyon	Bradi3g47110.1	711	Phenylalanine ammonia-lyase
cluster 59	127	Brachypodium distachyon	Bradi3g49270.1	712	Phenylalanine ammonia-lyase
cluster 59	127	Brachypodium distachyon	Bradi3g48840.1	713	Phenylalanine ammonia-lyase
cluster 59	127	Brachypodium distachyon	Bradi3g49280.1	713	Phenylalanine ammonia-lyase
cluster 59	127	Brachypodium distachyon	Bradi3g47120.1	715	Phenylalanine ammonia-lyase
cluster 59	127	Brachypodium distachyon	Bradi5g15830.1	716	Phenylalanine ammonia-lyase
cluster 59	127	Brachypodium distachyon	Bradi3g49260.1	718	Phenylalanine ammonia-lyase
cluster 59	127	Cenchrus ciliaris	PUT-165a-Cenchrus_ciliaris-3721	474	Phenylalanine ammonia-lyase
cluster 59	127	Cynodon dactylon	PUT-169a-Cynodon_dactylon-8472	280	Phenylalanine ammonia-lyase
cluster 59	127	Eragrostis curvula	PUT-165a-Eragrostis_curvula-6064	136	Phenylalanine ammonia-lyase
cluster 59	127	Eragrostis curvula	PUT-165a-Eragrostis_curvula-5060	152	Phenylalanine ammonia-lyase
cluster 59	127	Eragrostis curvula	PUT-165a-Eragrostis_curvula-740	284	Phenylalanine ammonia-lyase
cluster 59	127	Festuca arundinacea	PUT-175a-Festuca_arundinacea-5501	198	Phenylalanine ammonia-lyase
cluster 59	127	Festuca arundinacea	PUT-175a-Festuca_arundinacea-13795	502	Phenylalanine ammonia-lyase
cluster 59	127	Festuca arundinacea	PUT-175a-Festuca_arundinacea-4933073	577	Phenylalanine ammonia-lyase
cluster 59	127	Festuca pratensis	PUT-173a-Festuca_pratensis-30406	439	phenylalanine ammonia-lyase
cluster 59	127	Festuca pratensis	PUT-173a-Festuca_pratensis-35992	447	Phenylalanine ammonia-lyase
cluster 59	127	Festuca pratensis	PUT-173a-Festuca_pratensis-13314	519	Phenylalanine ammonia-lyase
cluster 59	127	Hordeum vulgare	PUT-169a-Hordeum_vulgare-12977	297	Phenylalanine ammonia-lyase
cluster 59	127	Hordeum vulgare	PUT-169a-Hordeum_vulgare-3943	526	Phenylalanine ammonia-lyase
cluster 59	127	Hordeum vulgare	PUT-169a-Hordeum_vulgare-459116440	562	Phenylalanine ammonia-lyase
cluster 59	127	Hordeum vulgare	PUT-169a-Hordeum_vulgare-8735	707	Phenylalanine ammonia-lyase
cluster 59	127	Hordeum vulgare	PUT-169a-Hordeum_vulgare-3944	713	Phenylalanine ammonia-lyase
cluster 59	127	Hordeum vulgare	PUT-169a-Hordeum_vulgare-6219	713	Phenylalanine ammonia-lyase
cluster 59	127	Hordeum vulgare	PUT-169a-Hordeum_vulgare-50200	713	Phenylalanine ammonia-lyase
cluster 59	127	Hordeum vulgare	PUT-169a-Hordeum_vulgare-12654	757	Phenylalanine ammonia-lyase
cluster 59	127	Hordeum vulgare	PUT-169a-Hordeum_vulgare-105526	776	Phenylalanine ammonia-lyase
cluster 59	127	Leymus cinereus x Leymus triticoides	PUT-163a-Leymus_cinereus_x_Leymus_triticoides-9295	129	Phenylalanine ammonia-lyase
cluster 59	127	Leymus cinereus x Leymus triticoides	PUT-163a-Leymus_cinereus_x_Leymus_triticoides-13306	187	Phenylalanine ammonia-lyase
cluster 59	127	Leymus cinereus x Leymus triticoides	PUT-163a-Leymus_cinereus_x_Leymus_triticoides-5713912	451	Phenylalanine ammonia-lyase
cluster 59	127	Leymus cinereus x Leymus triticoides	PUT-163a-Leymus_cinereus_x_Leymus_triticoides-9253	713	Phenylalanine ammonia-lyase
cluster 59	127	Oryza sativa	LOC_Os02g41650.2|13102.m04600|protein	558	phenylalanine ammonia-lyase, putative, expressed
cluster 59	127	Oryza sativa	LOC_Os02g41630.2|13102.m04596|protein	702	phenylalanine ammonia-lyase, putative, expressed
cluster 59	127	Oryza sativa	LOC_Os04g43760.1|13104.m04352|protein	708	phenylalanine ammonia-lyase, putative, expressed
cluster 59	127	Oryza sativa	LOC_Os02g41680.1|13102.m04603|protein	714	phenylalanine ammonia-lyase, putative, expressed
cluster 59	127	Oryza sativa	LOC_Os02g41670.1|13102.m04602|protein	714	phenylalanine ammonia-lyase, putative, expressed
cluster 59	127	Oryza sativa	LOC_Os04g43800.1|13104.m04357|protein	715	phenylalanine ammonia-lyase, putative, expressed
cluster 59	127	Oryza sativa	LOC_Os05g35290.1|13105.m03695|protein	717	phenylalanine ammonia-lyase, putative, expressed
cluster 59	127	Oryza sativa	LOC_Os02g41650.3|13102.m04599|protein	719	phenylalanine ammonia-lyase, putative, expressed
cluster 59	127	Oryza sativa	LOC_Os02g41650.1|13102.m04598|protein	719	phenylalanine ammonia-lyase, putative, expressed
cluster 59	127	Panicum virgatum	PUT-169a-Panicum_virgatum-23860	154	Phenylalanine ammonia-lyase
cluster 59	127	Panicum virgatum	PUT-169a-Panicum_virgatum-255102810	213	Phenylalanine ammonia-lyase
cluster 59	127	Panicum virgatum	PUT-169a-Panicum_virgatum-135102804	419	Phenylalanine ammonia-lyase
cluster 59	127	Panicum virgatum	PUT-169a-Panicum_virgatum-135102802	426	Phenylalanine ammonia-lyase
cluster 59	127	Panicum virgatum	PUT-169a-Panicum_virgatum-78769	499	Phenylalanine ammonia-lyase
cluster 59	127	Panicum virgatum	PUT-169a-Panicum_virgatum-135102803	576	Phenylalanine ammonia-lyase
cluster 59	127	Panicum virgatum	PUT-169a-Panicum_virgatum-78771	715	Phenylalanine ammonia-lyase
cluster 59	127	Panicum virgatum	PUT-169a-Panicum_virgatum-78770	719	Phenylalanine ammonia-lyase
cluster 59	127	Populus trichocarpa	POPTR_0010s23110.1	683	Phenylalanine ammonia-lyase
cluster 59	127	Populus trichocarpa	POPTR_0008s03810.1	712	Phenylalanine ammonia-lyase
cluster 59	127	Populus trichocarpa	POPTR_0010s23100.1	712	Phenylalanine ammonia-lyase
cluster 59	127	Populus trichocarpa	POPTR_0006s12870.1	715	Phenylalanine ammonia-lyase
cluster 59	127	Populus trichocarpa	POPTR_0016s09230.1	716	Phenylalanine ammonia-lyase
cluster 59	127	Pseudoroegneria spicata	PUT-169a-Pseudoroegneria_spicata-6723	295	Phenylalanine ammonia-lyase
cluster 59	127	Pseudoroegneria spicata	PUT-169a-Pseudoroegneria_spicata-3317	389	Phenylalanine ammonia-lyase
cluster 59	127	Pseudoroegneria spicata	PUT-169a-Pseudoroegneria_spicata-6722	430	Phenylalanine ammonia-lyase
cluster 59	127	Saccharum officinarum	PUT-157a-Saccharum_officinarum-22165	248	Phenylalanine ammonia-lyase
cluster 59	127	Saccharum officinarum	PUT-157a-Saccharum_officinarum-124672	255	Phenylalanine ammonia-lyase
cluster 59	127	Saccharum officinarum	PUT-157a-Saccharum_officinarum-750133730	313	Phenylalanine ammonia-lyase
cluster 59	127	Saccharum officinarum	PUT-157a-Saccharum_officinarum-53113	325	Phenylalanine ammonia-lyase
cluster 59	127	Saccharum officinarum	PUT-157a-Saccharum_officinarum-53129	340	Phenylalanine ammonia-lyase
cluster 59	127	Saccharum officinarum	PUT-157a-Saccharum_officinarum-53131	351	Phenylalanine ammonia-lyase
cluster 59	127	Saccharum officinarum	PUT-157a-Saccharum_officinarum-124673	468	Phenylalanine ammonia-lyase
cluster 59	127	Secale cereale	PUT-157a-Secale_cereale-1053	180	Phenylalanine ammonia-lyase
cluster 59	127	Secale cereale	PUT-157a-Secale_cereale-899	191	Phenylalanine ammonia-lyase
cluster 59	127	Sorghum bicolor	Sb06g022750.1	689	Phenylalanine ammonia-lyase
cluster 59	127	Sorghum bicolor	Sb06g022740.1	704	Phenylalanine ammonia-lyase
cluster 59	127	Sorghum bicolor	Sb04g026510.1	705	Phenylalanine ammonia-lyase
cluster 59	127	Sorghum bicolor	Sb04g026550.1	715	Phenylalanine ammonia-lyase
cluster 59	127	Sorghum bicolor	Sb04g026560.1	715	Phenylalanine ammonia-lyase
cluster 59	127	Sorghum bicolor	Sb04g026530.1	715	Phenylalanine ammonia-lyase
cluster 59	127	Sorghum bicolor	Sb04g026540.1	715	Phenylalanine ammonia-lyase
cluster 59	127	Sorghum bicolor	Sb04g026520.1	719	Phenylalanine ammonia-lyase
cluster 59	127	Sorghum propinquum	PUT-157a-Sorghum_propinquum-5997	131	Phenylalanine ammonia-lyase
cluster 59	127	Sorghum propinquum	PUT-157a-Sorghum_propinquum-579484	307	Phenylalanine ammonia-lyase
cluster 59	127	Sorghum propinquum	PUT-157a-Sorghum_propinquum-249486	397	Phenylalanine ammonia-lyase
cluster 59	127	Sorghum propinquum	PUT-157a-Sorghum_propinquum-3046	511	Phenylalanine ammonia-lyase
cluster 59	127	Triticum aestivum	PUT-163b-Triticum_aestivum-3075165445	252	Phenylalanine ammonia-lyase
cluster 59	127	Triticum aestivum	PUT-163c-Triticum_aestivum-2022	263	Phenylalanine ammonia-lyase
cluster 59	127	Triticum aestivum	PUT-163b-Triticum_aestivum-3075165446	276	Phenylalanine ammonia-lyase
cluster 59	127	Triticum aestivum	PUT-163b-Triticum_aestivum-14946	439	Phenylalanine ammonia-lyase
cluster 59	127	Triticum aestivum	PUT-163b-Triticum_aestivum-3459165448	602	Phenylalanine ammonia-lyase
cluster 59	127	Triticum aestivum	PUT-163c-Triticum_aestivum-2018	613	Phenylalanine ammonia-lyase
cluster 59	127	Triticum aestivum	PUT-163b-Triticum_aestivum-3000165444	616	Phenylalanine ammonia-lyase
cluster 59	127	Triticum aestivum	PUT-163b-Triticum_aestivum-3075165443	634	Phenylalanine ammonia-lyase
cluster 59	127	Triticum monococcum	PUT-157a-Triticum_monococcum-3555	336	Phenylalanine ammonia-lyase
cluster 59	127	Triticum turgidum subsp durum	PUT-169a-Triticum_turgidum_subsp__durum-128579	216	Phenylalanine ammonia-lyase
cluster 59	127	Triticum turgidum subsp durum	PUT-169a-Triticum_turgidum_subsp__durum-2816	216	Phenylalanine ammonia-lyase
cluster 59	127	Triticum turgidum subsp durum	PUT-169a-Triticum_turgidum_subsp__durum-5386	270	Phenylalanine ammonia-lyase
cluster 59	127	Vitis vinifera	GSVIVT00024295001	457	Phenylalanine ammonia-lyase
cluster 59	127	Vitis vinifera	GSVIVT00025703001	464	Phenylalanine ammonia-lyase
cluster 59	127	Vitis vinifera	GSVIVT00024315001	465	Phenylalanine ammonia-lyase
cluster 59	127	Vitis vinifera	GSVIVT00024303001	465	Phenylalanine ammonia-lyase
cluster 59	127	Vitis vinifera	GSVIVT00024299001	465	Phenylalanine ammonia-lyase
cluster 59	127	Vitis vinifera	GSVIVT00024305001	465	Phenylalanine ammonia-lyase
cluster 59	127	Vitis vinifera	GSVIVT00024294001	475	Phenylalanine ammonia-lyase
cluster 59	127	Vitis vinifera	GSVIVT00025214001	502	Phenylalanine ammonia-lyase
cluster 59	127	Vitis vinifera	GSVIVT00024292001	557	Phenylalanine ammonia-lyase
cluster 59	127	Vitis vinifera	GSVIVT00016257001	579	Phenylalanine ammonia-lyase
cluster 59	127	Vitis vinifera	GSVIVT00024306001	680	Phenylalanine ammonia-lyase
cluster 59	127	Zea mays	GRMZM2G160541_P03	362	Phenylalanine ammonia-lyase
cluster 59	127	Zea mays	GRMZM2G160541_P01	508	Phenylalanine ammonia-lyase
cluster 59	127	Zea mays	GRMZM2G160541_P02	508	Phenylalanine ammonia-lyase
cluster 59	127	Zea mays	GRMZM2G029048_P01	557	Phenylalanine ammonia-lyase
cluster 59	127	Zea mays	GRMZM2G074604_P02	557	Phenylalanine ammonia-lyase
cluster 59	127	Zea mays	GRMZM2G081582_P02	557	Phenylalanine ammonia-lyase
cluster 59	127	Zea mays	GRMZM2G441347_P01	703	Phenylalanine ammonia-lyase
cluster 59	127	Zea mays	GRMZM2G074604_P01	703	Phenylalanine ammonia-lyase
cluster 59	127	Zea mays	GRMZM2G334660_P01	704	Phenylalanine ammonia-lyase
cluster 59	127	Zea mays	GRMZM2G118345_P01	715	Phenylalanine ammonia-lyase
cluster 59	127	Zea mays	GRMZM2G170692_P01	715	Phenylalanine ammonia-lyase
cluster 59	127	Zea mays	GRMZM2G063917_P01	716	Phenylalanine ammonia-lyase
cluster 59	127	Zea mays	GRMZM2G081582_P01	718	Phenylalanine ammonia-lyase
cluster 59	127	Zea mays	GRMZM2G029048_P02	719	Phenylalanine ammonia-lyase
cluster 12559	13	Eragrostis curvula	PUT-165a-Eragrostis_curvula-1252	67	Phenylalanine ammonia-lyase
cluster 12559	13	Saccharum officinarum	PUT-157a-Saccharum_officinarum-42978	93	Phenylalanine ammonia-lyase
cluster 12559	13	Saccharum officinarum	PUT-157a-Saccharum_officinarum-55928	108	Phenylalanine ammonia-lyase
cluster 12559	13	Saccharum officinarum	PUT-157a-Saccharum_officinarum-55921	130	Phenylalanine ammonia-lyase
cluster 12559	13	Saccharum officinarum	PUT-157a-Saccharum_officinarum-85030	143	Phenylalanine ammonia-lyase
cluster 12559	13	Saccharum officinarum	PUT-157a-Saccharum_officinarum-61684	143	Phenylalanine ammonia-lyase
cluster 12559	13	Saccharum officinarum	PUT-157a-Saccharum_officinarum-55914	147	Phenylalanine ammonia-lyase
cluster 12559	13	Saccharum officinarum	PUT-157a-Saccharum_officinarum-53120	155	Phenylalanine ammonia-lyase
cluster 12559	13	Saccharum officinarum	PUT-157a-Saccharum_officinarum-55931	159	Phenylalanine ammonia-lyase
cluster 12559	13	Saccharum officinarum	PUT-157a-Saccharum_officinarum-55877	161	Phenylalanine ammonia-lyase
cluster 12559	13	Saccharum officinarum	PUT-157a-Saccharum_officinarum-53102	177	Phenylalanine ammonia-lyase
cluster 12559	13	Saccharum officinarum	PUT-157a-Saccharum_officinarum-53104	179	Phenylalanine ammonia-lyase
cluster 12559	13	Saccharum officinarum	PUT-157a-Saccharum_officinarum-53127	183	Phenylalanine ammonia-lyase
cluster 13255	12	Avena barbata	PUT-173a-Avena_barbata-11573	221	Phenylalanine ammonia-lyase
cluster 13255	12	Cenchrus ciliaris	PUT-165a-Cenchrus_ciliaris-9043	99	Phenylalanine ammonia-lyase
cluster 13255	12	Festuca arundinacea	PUT-175a-Festuca_arundinacea-28922	202	Phenylalanine ammonia-lyase
cluster 13255	12	Hordeum vulgare	PUT-169a-Hordeum_vulgare-45539	324	Phenylalanine ammonia-lyase
cluster 13255	12	Panicum virgatum	PUT-169a-Panicum_virgatum-78899	215	Phenylalanine ammonia-lyase
cluster 13255	12	Saccharum officinarum	PUT-157a-Saccharum_officinarum-81290	183	Phenylalanine ammonia-lyase
cluster 13255	12	Sorghum propinquum	PUT-157a-Sorghum_propinquum-5960	111	Phenylalanine ammonia-lyase
cluster 13255	12	Triticum aestivum	PUT-163c-Triticum_aestivum-8323	200	Phenylalanine ammonia-lyase
cluster 13255	12	Triticum aestivum	PUT-163b-Triticum_aestivum-45819	246	Phenylalanine ammonia-lyase
cluster 13255	12	Triticum aestivum	PUT-163b-Triticum_aestivum-51838	276	Phenylalanine ammonia-lyase
cluster 13255	12	Triticum aestivum	PUT-163b-Triticum_aestivum-45820	310	Phenylalanine ammonia-lyase
cluster 13255	12	Triticum monococcum	PUT-157a-Triticum_monococcum-4814	193	Phenylalanine ammonia-lyase
cluster 15852	9	Avena barbata	PUT-173a-Avena_barbata-6921	342	Phenylalanine ammonia-lyase
cluster 15852	9	Festuca arundinacea	PUT-175a-Festuca_arundinacea-7591	196	Phenylalanine ammonia-lyase
cluster 15852	9	Festuca pratensis	PUT-173a-Festuca_pratensis-34281	327	phenylalanine ammonia-lyase
cluster 15852	9	Saccharum officinarum	PUT-157a-Saccharum_officinarum-9862	224	Phenylalanine ammonia-lyase
cluster 15852	9	Saccharum officinarum	PUT-157a-Saccharum_officinarum-22166	262	Phenylalanine ammonia-lyase
cluster 15852	9	Secale cereale	PUT-157a-Secale_cereale-1195	128	phenylalanine ammonia-lyase
cluster 15852	9	Triticum aestivum	PUT-163c-Triticum_aestivum-2025	414	phenylalanine ammonia-lyase
cluster 15852	9	Triticum monococcum	PUT-157a-Triticum_monococcum-3541	183	Phenylalanine ammonia-lyase
cluster 15852	9	Triticum turgidum subsp durum	PUT-169a-Triticum_turgidum_subsp__durum-6544	241	phenylalanine ammonia-lyase
cluster 18277	7	Festuca arundinacea	PUT-175a-Festuca_arundinacea-993	166	Phenylalanine ammonia-lyase
cluster 18277	7	Leymus cinereus x Leymus triticoides	PUT-163a-Leymus_cinereus_x_Leymus_triticoides-9360	157	phenylalanine ammonia-lyase
cluster 18277	7	Panicum virgatum	PUT-169a-Panicum_virgatum-24796	148	Phenylalanine ammonia-lyase
cluster 18277	7	Sorghum propinquum	PUT-157a-Sorghum_propinquum-6456	192	Phenylalanine ammonia-lyase
cluster 18277	7	Triticum monococcum	PUT-157a-Triticum_monococcum-5458	113	Phenylalanine ammonia-lyase
cluster 18277	7	Triticum turgidum subsp durum	PUT-169a-Triticum_turgidum_subsp__durum-8401	122	Phenylalanine ammonia-lyase
cluster 18277	7	Triticum turgidum subsp durum	PUT-169a-Triticum_turgidum_subsp__durum-2576	126	Phenylalanine ammonia-lyase
cluster 20310	6	Avena barbata	PUT-173a-Avena_barbata-11812	224	Phenylalanine ammonia-lyase
cluster 20310	6	Avena barbata	PUT-173a-Avena_barbata-12418	268	Phenylalanine ammonia-lyase
cluster 21216	6	Hordeum vulgare	PUT-169a-Hordeum_vulgare-12967	122	phenylalanine ammonia-lyase
cluster 20760	6	Populus trichocarpa	POPTR_0015s15520.1	267	Phenylalanine ammonia-lyase
cluster 21216	6	Saccharum officinarum	PUT-157a-Saccharum_officinarum-119345	201	Phenylalanine ammonia-lyase
cluster 21216	6	Saccharum officinarum	PUT-157a-Saccharum_officinarum-53141	239	Phenylalanine ammonia-lyase
cluster 20310	6	Saccharum officinarum	PUT-157a-Saccharum_officinarum-65632	241	Phenylalanine ammonia-lyase
cluster 20310	6	Triticum aestivum	PUT-163b-Triticum_aestivum-2564	227	Phenylalanine ammonia-lyase
cluster 20310	6	Triticum aestivum	PUT-163b-Triticum_aestivum-3000165443	344	Phenylalanine ammonia-lyase
cluster 21216	6	Triticum aestivum	PUT-163b-Triticum_aestivum-72174	379	Phenylalanine ammonia-lyase
cluster 21216	6	Triticum turgidum subsp durum	PUT-169a-Triticum_turgidum_subsp__durum-5462	124	Phenylalanine ammonia-lyase
cluster 20310	6	Triticum turgidum subsp durum	PUT-169a-Triticum_turgidum_subsp__durum-4549	131	Phenylalanine ammonia-lyase
cluster 21216	6	Zea mays	GRMZM2G074604_P03	122	Phenylalanine ammonia-lyase
cluster 23448	5	Cynodon dactylon	PUT-169a-Cynodon_dactylon-9440	61	Phenylalanine ammonia-lyase
cluster 23448	5	Saccharum officinarum	PUT-157a-Saccharum_officinarum-124740	110	Phenylalanine ammonia-lyase
cluster 23448	5	Saccharum officinarum	PUT-157a-Saccharum_officinarum-119205	140	Phenylalanine ammonia-lyase
cluster 23448	5	Saccharum officinarum	PUT-157a-Saccharum_officinarum-84998	147	Phenylalanine ammonia-lyase
cluster 23448	5	Triticum aestivum	PUT-163b-Triticum_aestivum-51843	94	Phenylalanine ammonia-lyase
cluster 27247	4	Avena barbata	PUT-173a-Avena_barbata-8367	431	Phenylalanine ammonia-lyase
cluster 25793	4	Cynodon dactylon	PUT-169a-Cynodon_dactylon-9082	75	Phenylalanine ammonia-lyase
cluster 25793	4	Festuca arundinacea	PUT-175a-Festuca_arundinacea-16150	140	Phenylalanine ammonia-lyase
cluster 28802	4	Festuca arundinacea	PUT-175a-Festuca_arundinacea-15241	191	Phenylalanine ammonia-lyase
cluster 26788	4	Festuca pratensis	PUT-173a-Festuca_pratensis-5534	188	Phenylalanine ammonia-lyase
cluster 25793	4	Hordeum vulgare	PUT-169a-Hordeum_vulgare-12975	96	Phenylalanine ammonia-lyase
cluster 26788	4	Leymus cinereus x Leymus triticoides	PUT-163a-Leymus_cinereus_x_Leymus_triticoides-3893	181	Phenylalanine ammonia-lyase
cluster 25793	4	Panicum virgatum	PUT-169a-Panicum_virgatum-26732	78	Phenylalanine ammonia-lyase
cluster 26788	4	Panicum virgatum	PUT-169a-Panicum_virgatum-317102808	195	Phenylalanine ammonia-lyase
cluster 27247	4	Panicum virgatum	PUT-169a-Panicum_virgatum-23864	417	Phenylalanine ammonia-lyase
cluster 27247	4	Saccharum officinarum	PUT-157a-Saccharum_officinarum-53117	387	Phenylalanine ammonia-lyase
cluster 26788	4	Sorghum propinquum	PUT-157a-Sorghum_propinquum-4608	157	Phenylalanine ammonia-lyase
cluster 28802	4	Triticum aestivum	PUT-163b-Triticum_aestivum-25650	387	phenylalanine ammonia-lyase
cluster 27247	4	Triticum aestivum	PUT-163c-Triticum_aestivum-8325	437	Phenylalanine ammonia-lyase
cluster 28802	4	Triticum monococcum	PUT-157a-Triticum_monococcum-6888	221	Phenylalanine ammonia-lyase
cluster 28802	4	Vitis vinifera	GSVIVT00006148001	185	Phenylalanine ammonia-lyase
cluster 34921	3	Avena barbata	PUT-173a-Avena_barbata-7448	264	Phenylalanine ammonia-lyase
cluster 34920	3	Cynodon dactylon	PUT-169a-Cynodon_dactylon-11905	257	Phenylalanine ammonia-lyase
cluster 31356	3	Festuca arundinacea	PUT-175a-Festuca_arundinacea-16086	254	Phenylalanine ammonia-lyase
cluster 34921	3	Festuca arundinacea	PUT-175a-Festuca_arundinacea-4933074	304	Phenylalanine ammonia-lyase
cluster 36932	3	Oryza sativa	LOC_Os12g33610.1|13112.m03427|protein	681	phenylalanine ammonia-lyase, putative, expressed
cluster 36932	3	Oryza sativa	LOC_Os11g48110.1|13111.m04812|protein	701	phenylalanine ammonia-lyase, putative
cluster 31356	3	Panicum virgatum	PUT-169a-Panicum_virgatum-12712	283	Phenylalanine ammonia-lyase
cluster 34498	3	Saccharum officinarum	PUT-157a-Saccharum_officinarum-81289	170	Phenylalanine ammonia-lyase
cluster 34498	3	Saccharum officinarum	PUT-157a-Saccharum_officinarum-81292	174	Phenylalanine ammonia-lyase
cluster 34498	3	Saccharum officinarum	PUT-157a-Saccharum_officinarum-81288	238	Phenylalanine ammonia-lyase
cluster 34921	3	Saccharum officinarum	PUT-157a-Saccharum_officinarum-53115	289	Phenylalanine ammonia-lyase
cluster 34920	3	Saccharum officinarum	PUT-157a-Saccharum_officinarum-53137	315	Phenylalanine ammonia-lyase
cluster 36932	3	Sorghum bicolor	Sb01g014020.1	710	Phenylalanine ammonia-lyase
cluster 32782	3	Triticum aestivum	PUT-163b-Triticum_aestivum-3122165446	68	Phenylalanine ammonia-lyase
cluster 32185	3	Triticum aestivum	PUT-163c-Triticum_aestivum-7089	183	phenylalanine ammonia-lyase
cluster 32185	3	Triticum aestivum	PUT-163c-Triticum_aestivum-2113	189	phenylalanine ammonia-lyase
cluster 32185	3	Triticum aestivum	PUT-163c-Triticum_aestivum-2026	212	phenylalanine ammonia-lyase
cluster 34920	3	Triticum aestivum	PUT-163b-Triticum_aestivum-3075165444	306	Phenylalanine ammonia-lyase
cluster 31356	3	Triticum turgidum subsp durum	PUT-169a-Triticum_turgidum_subsp__durum-6015	131	phenylalanine ammonia-lyase
cluster 42042	2	Agrostis stolonifera	PUT-173a-Agrostis_stolonifera-4978	152	Phenylalanine ammonia-lyase
cluster 41895	2	Avena barbata	PUT-173a-Avena_barbata-13533	264	Phenylalanine ammonia-lyase
cluster 47070	2	Cynodon dactylon	PUT-169a-Cynodon_dactylon-7787	157	Phenylalanine ammonia-lyase
cluster 42042	2	Festuca arundinacea	PUT-175a-Festuca_arundinacea-14459	125	Phenylalanine ammonia-lyase
cluster 41895	2	Festuca arundinacea	PUT-175a-Festuca_arundinacea-3601	204	Phenylalanine ammonia-lyase
cluster 46004	2	Hordeum vulgare	PUT-169a-Hordeum_vulgare-26694	61	Phenylalanine ammonia-lyase
cluster 46004	2	Hordeum vulgare	PUT-169a-Hordeum_vulgare-26693	61	Phenylalanine ammonia-lyase
cluster 45446	2	Hordeum vulgare	PUT-169a-Hordeum_vulgare-89219	79	Phenylalanine ammonia-lyase
cluster 45446	2	Hordeum vulgare	PUT-169a-Hordeum_vulgare-45656	92	Phenylalanine ammonia-lyase
cluster 43839	2	Panicum virgatum	PUT-169a-Panicum_virgatum-23853	154	Phenylalanine ammonia-lyase
cluster 43839	2	Panicum virgatum	PUT-169a-Panicum_virgatum-71405	158	Phenylalanine ammonia-lyase
cluster 50504	2	Panicum virgatum	PUT-169a-Panicum_virgatum-94478	210	Phenylalanine ammonia-lyase
cluster 57630	2	Saccharum officinarum	PUT-157a-Saccharum_officinarum-55884	94	Phenylalanine ammonia-lyase
cluster 57630	2	Saccharum officinarum	PUT-157a-Saccharum_officinarum-126496	106	Phenylalanine ammonia-lyase
cluster 54151	2	Saccharum officinarum	PUT-157a-Saccharum_officinarum-81291	163	Phenylalanine ammonia-lyase
cluster 58213	2	Saccharum officinarum	PUT-157a-Saccharum_officinarum-115781	172	Phenylalanine ammonia-lyase
cluster 58213	2	Saccharum officinarum	PUT-157a-Saccharum_officinarum-6176	175	Phenylalanine ammonia-lyase
cluster 55135	2	Saccharum officinarum	PUT-157a-Saccharum_officinarum-55938	219	Phenylalanine ammonia-lyase
cluster 55135	2	Saccharum officinarum	PUT-157a-Saccharum_officinarum-55904	222	Phenylalanine ammonia-lyase
cluster 54151	2	Sorghum propinquum	PUT-157a-Sorghum_propinquum-6119	75	Phenylalanine ammonia-lyase
cluster 50504	2	Triticum aestivum	PUT-163b-Triticum_aestivum-16808	208	Phenylalanine ammonia-lyase
cluster 49735	2	Triticum aestivum	PUT-163b-Triticum_aestivum-3287165445	244	Phenylalanine ammonia-lyase
cluster 49735	2	Triticum aestivum	PUT-163b-Triticum_aestivum-3287165446	250	Phenylalanine ammonia-lyase
cluster 51357	2	Triticum aestivum	PUT-163b-Triticum_aestivum-3287165444	384	Phenylalanine ammonia-lyase
cluster 51357	2	Triticum aestivum	PUT-163b-Triticum_aestivum-1367165448	392	Phenylalanine ammonia-lyase
cluster 62136	2	Vitis vinifera	GSVIVT00015138001	666	Phenylalanine ammonia-lyase
cluster 62136	2	Vitis vinifera	GSVIVT00015124001	781	Phenylalanine ammonia-lyase
NA	NA	Agrostis stolonifera	PUT-173a-Agrostis_stolonifera-2051	96	Phenylalanine ammonia-lyase
NA	NA	Agrostis stolonifera	PUT-173a-Agrostis_stolonifera-7503	134	phenylalanine ammonia-lyase
NA	NA	Arabidopsis thaliana	AT5G04230.1	694	pal3 (Phe ammonia lyase 3); phenylalanine ammonia-lyase
NA	NA	Avena barbata	PUT-173a-Avena_barbata-3349	88	Phenylalanine ammonia-lyase
NA	NA	Avena barbata	PUT-173a-Avena_barbata-10471	105	Phenylalanine ammonia-lyase
NA	NA	Avena barbata	PUT-173a-Avena_barbata-6587	132	Phenylalanine ammonia-lyase
NA	NA	Avena barbata	PUT-173a-Avena_barbata-7288	138	Phenylalanine ammonia-lyase
NA	NA	Avena barbata	PUT-173a-Avena_barbata-6963	169	Phenylalanine ammonia-lyase
NA	NA	Avena barbata	PUT-173a-Avena_barbata-2797	190	Phenylalanine ammonia-lyase
NA	NA	Avena barbata	PUT-173a-Avena_barbata-2717	194	Phenylalanine ammonia-lyase
NA	NA	Avena barbata	PUT-173a-Avena_barbata-9389	200	Phenylalanine ammonia-lyase
NA	NA	Avena barbata	PUT-173a-Avena_barbata-10147	210	Phenylalanine ammonia-lyase
NA	NA	Avena barbata	PUT-173a-Avena_barbata-7074	215	Phenylalanine ammonia-lyase
NA	NA	Avena barbata	PUT-173a-Avena_barbata-13856	222	Phenylalanine ammonia-lyase
NA	NA	Avena barbata	PUT-173a-Avena_barbata-21363	225	Phenylalanine ammonia-lyase
NA	NA	Avena barbata	PUT-173a-Avena_barbata-20310	247	Phenylalanine ammonia-lyase
NA	NA	Avena barbata	PUT-173a-Avena_barbata-12564	253	Phenylalanine ammonia-lyase
NA	NA	Avena barbata	PUT-173a-Avena_barbata-13812	289	Phenylalanine ammonia-lyase
NA	NA	Avena sativa	PUT-173a-Avena_sativa-3893	47	Phenylalanine ammonia-lyase
NA	NA	Cenchrus ciliaris	PUT-165a-Cenchrus_ciliaris-3766	136	Phenylalanine ammonia-lyase
NA	NA	Festuca arundinacea	PUT-175a-Festuca_arundinacea-30662	133	Phenylalanine ammonia-lyase
NA	NA	Festuca arundinacea	PUT-175a-Festuca_arundinacea-14854	149	Phenylalanine ammonia-lyase
NA	NA	Festuca arundinacea	PUT-175a-Festuca_arundinacea-8484	162	Phenylalanine ammonia-lyase
NA	NA	Festuca arundinacea	PUT-175a-Festuca_arundinacea-10973	187	Phenylalanine ammonia-lyase
NA	NA	Festuca arundinacea	PUT-175a-Festuca_arundinacea-13794	195	Phenylalanine ammonia-lyase
NA	NA	Festuca arundinacea	PUT-175a-Festuca_arundinacea-11002	206	Phenylalanine ammonia-lyase
NA	NA	Festuca pratensis	PUT-173a-Festuca_pratensis-8949	224	Phenylalanine ammonia-lyase
NA	NA	Festuca pratensis	PUT-173a-Festuca_pratensis-27615	354	phenylalanine ammonia-lyase
NA	NA	Festuca pratensis	PUT-173a-Festuca_pratensis-25742	434	Phenylalanine ammonia-lyase
NA	NA	Hordeum vulgare	PUT-169a-Hordeum_vulgare-64893	51	Phenylalanine ammonia-lyase
NA	NA	Hordeum vulgare	PUT-169a-Hordeum_vulgare-20915	72	Phenylalanine ammonia-lyase
NA	NA	Hordeum vulgare	PUT-169a-Hordeum_vulgare-6680	84	phenylalanine ammonia-lyase
NA	NA	Hordeum vulgare	PUT-169a-Hordeum_vulgare-6950	84	Phenylalanine ammonia-lyase
NA	NA	Hordeum vulgare	PUT-169a-Hordeum_vulgare-98266	85	Phenylalanine ammonia-lyase
NA	NA	Hordeum vulgare	PUT-169a-Hordeum_vulgare-9814	88	Phenylalanine ammonia-lyase
NA	NA	Hordeum vulgare	PUT-169a-Hordeum_vulgare-40011	89	Phenylalanine ammonia-lyase
NA	NA	Hordeum vulgare	PUT-169a-Hordeum_vulgare-19350	89	Phenylalanine ammonia-lyase
NA	NA	Hordeum vulgare	PUT-169a-Hordeum_vulgare-33778	102	phenylalanine ammonia-lyase
NA	NA	Hordeum vulgare	PUT-169a-Hordeum_vulgare-45649	105	Phenylalanine ammonia-lyase
NA	NA	Hordeum vulgare	PUT-169a-Hordeum_vulgare-45652	105	Phenylalanine ammonia-lyase
NA	NA	Hordeum vulgare	PUT-169a-Hordeum_vulgare-45962	106	Phenylalanine ammonia-lyase
NA	NA	Hordeum vulgare	PUT-169a-Hordeum_vulgare-562116446	108	phenylalanine ammonia-lyase
NA	NA	Hordeum vulgare	PUT-169a-Hordeum_vulgare-12963	116	Phenylalanine ammonia-lyase
NA	NA	Hordeum vulgare	PUT-169a-Hordeum_vulgare-89568	125	Phenylalanine ammonia-lyase
NA	NA	Hordeum vulgare	PUT-169a-Hordeum_vulgare-50747	128	phenylalanine ammonia-lyase
NA	NA	Hordeum vulgare	PUT-169a-Hordeum_vulgare-45646	131	Phenylalanine ammonia-lyase
NA	NA	Hordeum vulgare	PUT-169a-Hordeum_vulgare-23773	140	Phenylalanine ammonia-lyase
NA	NA	Hordeum vulgare	PUT-169a-Hordeum_vulgare-44597	141	Phenylalanine ammonia-lyase
NA	NA	Hordeum vulgare	PUT-169a-Hordeum_vulgare-459116441	142	Phenylalanine ammonia-lyase
NA	NA	Hordeum vulgare	PUT-169a-Hordeum_vulgare-45653	145	Phenylalanine ammonia-lyase
NA	NA	Hordeum vulgare	PUT-169a-Hordeum_vulgare-65622	146	Phenylalanine ammonia-lyase
NA	NA	Hordeum vulgare	PUT-169a-Hordeum_vulgare-89019	146	Phenylalanine ammonia-lyase
NA	NA	Hordeum vulgare	PUT-169a-Hordeum_vulgare-45655	149	Phenylalanine ammonia-lyase
NA	NA	Hordeum vulgare	PUT-169a-Hordeum_vulgare-12971	151	Phenylalanine ammonia-lyase
NA	NA	Hordeum vulgare	PUT-169a-Hordeum_vulgare-29099	154	Phenylalanine ammonia-lyase
NA	NA	Hordeum vulgare	PUT-169a-Hordeum_vulgare-45648	157	Phenylalanine ammonia-lyase
NA	NA	Hordeum vulgare	PUT-169a-Hordeum_vulgare-12964	165	Phenylalanine ammonia-lyase
NA	NA	Hordeum vulgare	PUT-169a-Hordeum_vulgare-45542	168	Phenylalanine ammonia-lyase
NA	NA	Hordeum vulgare	PUT-169a-Hordeum_vulgare-9650	175	Phenylalanine ammonia-lyase
NA	NA	Hordeum vulgare	PUT-169a-Hordeum_vulgare-45650	183	Phenylalanine ammonia-lyase
NA	NA	Hordeum vulgare	PUT-169a-Hordeum_vulgare-36339	199	Phenylalanine ammonia-lyase
NA	NA	Hordeum vulgare	PUT-169a-Hordeum_vulgare-12969	201	Phenylalanine ammonia-lyase
NA	NA	Hordeum vulgare	PUT-169a-Hordeum_vulgare-50537	205	Phenylalanine ammonia-lyase
NA	NA	Hordeum vulgare	PUT-169a-Hordeum_vulgare-45651	210	Phenylalanine ammonia-lyase
NA	NA	Hordeum vulgare	PUT-169a-Hordeum_vulgare-52262	214	Phenylalanine ammonia-lyase
NA	NA	Hordeum vulgare	PUT-169a-Hordeum_vulgare-6679	219	phenylalanine ammonia-lyase
NA	NA	Hordeum vulgare	PUT-169a-Hordeum_vulgare-62069	221	Phenylalanine ammonia-lyase
NA	NA	Hordeum vulgare	PUT-169a-Hordeum_vulgare-103422	221	Phenylalanine ammonia-lyase
NA	NA	Hordeum vulgare	PUT-169a-Hordeum_vulgare-12968	222	Phenylalanine ammonia-lyase
NA	NA	Hordeum vulgare	PUT-169a-Hordeum_vulgare-12966	222	phenylalanine ammonia-lyase
NA	NA	Hordeum vulgare	PUT-169a-Hordeum_vulgare-50249	226	Phenylalanine ammonia-lyase
NA	NA	Hordeum vulgare	PUT-169a-Hordeum_vulgare-6672	231	Phenylalanine ammonia-lyase
NA	NA	Hordeum vulgare	PUT-169a-Hordeum_vulgare-12974	232	Phenylalanine ammonia-lyase
NA	NA	Hordeum vulgare	PUT-169a-Hordeum_vulgare-6677	235	phenylalanine ammonia-lyase
NA	NA	Hordeum vulgare	PUT-169a-Hordeum_vulgare-45544	241	Phenylalanine ammonia-lyase
NA	NA	Hordeum vulgare	PUT-169a-Hordeum_vulgare-34040	246	Phenylalanine ammonia-lyase
NA	NA	Hordeum vulgare	PUT-169a-Hordeum_vulgare-12976	248	Phenylalanine ammonia-lyase
NA	NA	Hordeum vulgare	PUT-169a-Hordeum_vulgare-12973	272	Phenylalanine ammonia-lyase
NA	NA	Hordeum vulgare	PUT-169a-Hordeum_vulgare-12965	273	Phenylalanine ammonia-lyase
NA	NA	Hordeum vulgare	PUT-169a-Hordeum_vulgare-12970	274	Phenylalanine ammonia-lyase
NA	NA	Hordeum vulgare	PUT-169a-Hordeum_vulgare-45654	284	Phenylalanine ammonia-lyase
NA	NA	Hordeum vulgare	PUT-169a-Hordeum_vulgare-65488	284	phenylalanine ammonia-lyase
NA	NA	Hordeum vulgare	PUT-169a-Hordeum_vulgare-45543	288	Phenylalanine ammonia-lyase
NA	NA	Hordeum vulgare	PUT-169a-Hordeum_vulgare-12653	293	Phenylalanine ammonia-lyase
NA	NA	Hordeum vulgare	PUT-169a-Hordeum_vulgare-48963	299	Phenylalanine ammonia-lyase
NA	NA	Hordeum vulgare	PUT-169a-Hordeum_vulgare-4009	308	Phenylalanine ammonia-lyase
NA	NA	Hordeum vulgare	PUT-169a-Hordeum_vulgare-95443	331	Phenylalanine ammonia-lyase
NA	NA	Hordeum vulgare	PUT-169a-Hordeum_vulgare-12652	363	Phenylalanine ammonia-lyase
NA	NA	Hordeum vulgare	PUT-169a-Hordeum_vulgare-29098	450	Phenylalanine ammonia-lyase
NA	NA	Leymus cinereus x Leymus triticoides	PUT-163a-Leymus_cinereus_x_Leymus_triticoides-9294	227	Phenylalanine ammonia-lyase
NA	NA	Leymus cinereus x Leymus triticoides	PUT-163a-Leymus_cinereus_x_Leymus_triticoides-9252	279	Phenylalanine ammonia-lyase
NA	NA	Oryza sativa	LOC_Os04g43760.2|13104.m04353|protein	341	phenylalanine ammonia-lyase, putative, expressed
NA	NA	Panicum virgatum	PUT-169a-Panicum_virgatum-32227	79	Phenylalanine ammonia-lyase
NA	NA	Panicum virgatum	PUT-169a-Panicum_virgatum-78898	81	Phenylalanine ammonia-lyase
NA	NA	Panicum virgatum	PUT-169a-Panicum_virgatum-26727	88	Phenylalanine ammonia-lyase
NA	NA	Panicum virgatum	PUT-169a-Panicum_virgatum-24285	89	Phenylalanine ammonia-lyase
NA	NA	Panicum virgatum	PUT-169a-Panicum_virgatum-40740	90	Phenylalanine ammonia-lyase
NA	NA	Panicum virgatum	PUT-169a-Panicum_virgatum-90404	92	Phenylalanine ammonia-lyase
NA	NA	Panicum virgatum	PUT-169a-Panicum_virgatum-26733	93	Phenylalanine ammonia-lyase
NA	NA	Panicum virgatum	PUT-169a-Panicum_virgatum-26736	118	Phenylalanine ammonia-lyase
NA	NA	Panicum virgatum	PUT-169a-Panicum_virgatum-26729	132	Phenylalanine ammonia-lyase
NA	NA	Panicum virgatum	PUT-169a-Panicum_virgatum-26731	135	Phenylalanine ammonia-lyase
NA	NA	Panicum virgatum	PUT-169a-Panicum_virgatum-12743	141	Phenylalanine ammonia-lyase
NA	NA	Panicum virgatum	PUT-169a-Panicum_virgatum-26735	153	Phenylalanine ammonia-lyase
NA	NA	Panicum virgatum	PUT-169a-Panicum_virgatum-317102809	231	Phenylalanine ammonia-lyase
NA	NA	Panicum virgatum	PUT-169a-Panicum_virgatum-23855	242	Phenylalanine ammonia-lyase
NA	NA	Panicum virgatum	PUT-169a-Panicum_virgatum-26738	245	Phenylalanine ammonia-lyase
NA	NA	Panicum virgatum	PUT-169a-Panicum_virgatum-23862	271	Phenylalanine ammonia-lyase
NA	NA	Panicum virgatum	PUT-169a-Panicum_virgatum-24795	278	Phenylalanine ammonia-lyase
NA	NA	Panicum virgatum	PUT-169a-Panicum_virgatum-23856	296	Phenylalanine ammonia-lyase
NA	NA	Panicum virgatum	PUT-169a-Panicum_virgatum-4179	336	Phenylalanine ammonia-lyase
NA	NA	Panicum virgatum	PUT-169a-Panicum_virgatum-94477	396	Phenylalanine ammonia-lyase
NA	NA	Panicum virgatum	PUT-169a-Panicum_virgatum-23858	505	Phenylalanine ammonia-lyase
NA	NA	Saccharum officinarum	PUT-157a-Saccharum_officinarum-94294	50	Phenylalanine ammonia-lyase
NA	NA	Saccharum officinarum	PUT-157a-Saccharum_officinarum-92926	63	Phenylalanine ammonia-lyase
NA	NA	Saccharum officinarum	PUT-157a-Saccharum_officinarum-26257	64	Phenylalanine ammonia-lyase
NA	NA	Saccharum officinarum	PUT-157a-Saccharum_officinarum-386133734	75	Phenylalanine ammonia-lyase
NA	NA	Saccharum officinarum	PUT-157a-Saccharum_officinarum-386133733	76	Phenylalanine ammonia-lyase
NA	NA	Saccharum officinarum	PUT-157a-Saccharum_officinarum-45200	78	Phenylalanine ammonia-lyase
NA	NA	Saccharum officinarum	PUT-157a-Saccharum_officinarum-24816	87	Phenylalanine ammonia-lyase
NA	NA	Saccharum officinarum	PUT-157a-Saccharum_officinarum-11343	93	Phenylalanine ammonia-lyase
NA	NA	Saccharum officinarum	PUT-157a-Saccharum_officinarum-55897	109	Phenylalanine ammonia-lyase
NA	NA	Saccharum officinarum	PUT-157a-Saccharum_officinarum-55930	109	Phenylalanine ammonia-lyase
NA	NA	Saccharum officinarum	PUT-157a-Saccharum_officinarum-5322	111	Phenylalanine ammonia-lyase
NA	NA	Saccharum officinarum	PUT-157a-Saccharum_officinarum-102217	117	Phenylalanine ammonia-lyase
NA	NA	Saccharum officinarum	PUT-157a-Saccharum_officinarum-53103	119	Phenylalanine ammonia-lyase
NA	NA	Saccharum officinarum	PUT-157a-Saccharum_officinarum-55892	119	Phenylalanine ammonia-lyase
NA	NA	Saccharum officinarum	PUT-157a-Saccharum_officinarum-55873	121	Phenylalanine ammonia-lyase
NA	NA	Saccharum officinarum	PUT-157a-Saccharum_officinarum-7735	123	Phenylalanine ammonia-lyase
NA	NA	Saccharum officinarum	PUT-157a-Saccharum_officinarum-55881	124	Phenylalanine ammonia-lyase
NA	NA	Saccharum officinarum	PUT-157a-Saccharum_officinarum-55886	124	Phenylalanine ammonia-lyase
NA	NA	Saccharum officinarum	PUT-157a-Saccharum_officinarum-55909	126	Phenylalanine ammonia-lyase
NA	NA	Saccharum officinarum	PUT-157a-Saccharum_officinarum-115413	129	Phenylalanine ammonia-lyase
NA	NA	Saccharum officinarum	PUT-157a-Saccharum_officinarum-55910	133	Phenylalanine ammonia-lyase
NA	NA	Saccharum officinarum	PUT-157a-Saccharum_officinarum-55927	134	Phenylalanine ammonia-lyase
NA	NA	Saccharum officinarum	PUT-157a-Saccharum_officinarum-67487	135	Phenylalanine ammonia-lyase
NA	NA	Saccharum officinarum	PUT-157a-Saccharum_officinarum-71306	135	Phenylalanine ammonia-lyase
NA	NA	Saccharum officinarum	PUT-157a-Saccharum_officinarum-104704	135	Phenylalanine ammonia-lyase
NA	NA	Saccharum officinarum	PUT-157a-Saccharum_officinarum-53124	135	Phenylalanine ammonia-lyase
NA	NA	Saccharum officinarum	PUT-157a-Saccharum_officinarum-55894	136	Phenylalanine ammonia-lyase
NA	NA	Saccharum officinarum	PUT-157a-Saccharum_officinarum-55942	140	Phenylalanine ammonia-lyase
NA	NA	Saccharum officinarum	PUT-157a-Saccharum_officinarum-55911	141	Phenylalanine ammonia-lyase
NA	NA	Saccharum officinarum	PUT-157a-Saccharum_officinarum-53139	141	Phenylalanine ammonia-lyase
NA	NA	Saccharum officinarum	PUT-157a-Saccharum_officinarum-85075	142	Phenylalanine ammonia-lyase
NA	NA	Saccharum officinarum	PUT-157a-Saccharum_officinarum-53112	142	Phenylalanine ammonia-lyase
NA	NA	Saccharum officinarum	PUT-157a-Saccharum_officinarum-55874	143	Phenylalanine ammonia-lyase
NA	NA	Saccharum officinarum	PUT-157a-Saccharum_officinarum-32363	144	Phenylalanine ammonia-lyase
NA	NA	Saccharum officinarum	PUT-157a-Saccharum_officinarum-55936	146	Phenylalanine ammonia-lyase
NA	NA	Saccharum officinarum	PUT-157a-Saccharum_officinarum-55879	147	Phenylalanine ammonia-lyase
NA	NA	Saccharum officinarum	PUT-157a-Saccharum_officinarum-55889	147	Phenylalanine ammonia-lyase
NA	NA	Saccharum officinarum	PUT-157a-Saccharum_officinarum-55935	148	Phenylalanine ammonia-lyase
NA	NA	Saccharum officinarum	PUT-157a-Saccharum_officinarum-22277	148	Phenylalanine ammonia-lyase
NA	NA	Saccharum officinarum	PUT-157a-Saccharum_officinarum-53116	150	Phenylalanine ammonia-lyase
NA	NA	Saccharum officinarum	PUT-157a-Saccharum_officinarum-55883	152	Phenylalanine ammonia-lyase
NA	NA	Saccharum officinarum	PUT-157a-Saccharum_officinarum-548133734	154	Phenylalanine ammonia-lyase
NA	NA	Saccharum officinarum	PUT-157a-Saccharum_officinarum-55888	154	Phenylalanine ammonia-lyase
NA	NA	Saccharum officinarum	PUT-157a-Saccharum_officinarum-109399	156	Phenylalanine ammonia-lyase
NA	NA	Saccharum officinarum	PUT-157a-Saccharum_officinarum-106853	156	Phenylalanine ammonia-lyase
NA	NA	Saccharum officinarum	PUT-157a-Saccharum_officinarum-31202	157	Phenylalanine ammonia-lyase
NA	NA	Saccharum officinarum	PUT-157a-Saccharum_officinarum-55919	158	Phenylalanine ammonia-lyase
NA	NA	Saccharum officinarum	PUT-157a-Saccharum_officinarum-34355	159	Phenylalanine ammonia-lyase
NA	NA	Saccharum officinarum	PUT-157a-Saccharum_officinarum-55926	159	Phenylalanine ammonia-lyase
NA	NA	Saccharum officinarum	PUT-157a-Saccharum_officinarum-97183	159	Phenylalanine ammonia-lyase
NA	NA	Saccharum officinarum	PUT-157a-Saccharum_officinarum-9187	159	Phenylalanine ammonia-lyase
NA	NA	Saccharum officinarum	PUT-157a-Saccharum_officinarum-39872	163	Phenylalanine ammonia-lyase
NA	NA	Saccharum officinarum	PUT-157a-Saccharum_officinarum-79477	167	Phenylalanine ammonia-lyase
NA	NA	Saccharum officinarum	PUT-157a-Saccharum_officinarum-14133733	167	Phenylalanine ammonia-lyase
NA	NA	Saccharum officinarum	PUT-157a-Saccharum_officinarum-118178	169	Phenylalanine ammonia-lyase
NA	NA	Saccharum officinarum	PUT-157a-Saccharum_officinarum-53101	170	Phenylalanine ammonia-lyase
NA	NA	Saccharum officinarum	PUT-157a-Saccharum_officinarum-17133729	170	Phenylalanine ammonia-lyase
NA	NA	Saccharum officinarum	PUT-157a-Saccharum_officinarum-55913	171	Phenylalanine ammonia-lyase
NA	NA	Saccharum officinarum	PUT-157a-Saccharum_officinarum-55922	171	Phenylalanine ammonia-lyase
NA	NA	Saccharum officinarum	PUT-157a-Saccharum_officinarum-84681	172	Phenylalanine ammonia-lyase
NA	NA	Saccharum officinarum	PUT-157a-Saccharum_officinarum-55944	172	Phenylalanine ammonia-lyase
NA	NA	Saccharum officinarum	PUT-157a-Saccharum_officinarum-55890	173	Phenylalanine ammonia-lyase
NA	NA	Saccharum officinarum	PUT-157a-Saccharum_officinarum-101601	174	Phenylalanine ammonia-lyase
NA	NA	Saccharum officinarum	PUT-157a-Saccharum_officinarum-55899	174	Phenylalanine ammonia-lyase
NA	NA	Saccharum officinarum	PUT-157a-Saccharum_officinarum-61156	175	Phenylalanine ammonia-lyase
NA	NA	Saccharum officinarum	PUT-157a-Saccharum_officinarum-55891	176	Phenylalanine ammonia-lyase
NA	NA	Saccharum officinarum	PUT-157a-Saccharum_officinarum-47438	177	Phenylalanine ammonia-lyase
NA	NA	Saccharum officinarum	PUT-157a-Saccharum_officinarum-24776	177	Phenylalanine ammonia-lyase
NA	NA	Saccharum officinarum	PUT-157a-Saccharum_officinarum-55898	180	Phenylalanine ammonia-lyase
NA	NA	Saccharum officinarum	PUT-157a-Saccharum_officinarum-31145	180	Phenylalanine ammonia-lyase
NA	NA	Saccharum officinarum	PUT-157a-Saccharum_officinarum-22278	180	Phenylalanine ammonia-lyase
NA	NA	Saccharum officinarum	PUT-157a-Saccharum_officinarum-55932	182	Phenylalanine ammonia-lyase
NA	NA	Saccharum officinarum	PUT-157a-Saccharum_officinarum-55940	182	Phenylalanine ammonia-lyase
NA	NA	Saccharum officinarum	PUT-157a-Saccharum_officinarum-55907	183	Phenylalanine ammonia-lyase
NA	NA	Saccharum officinarum	PUT-157a-Saccharum_officinarum-55929	184	Phenylalanine ammonia-lyase
NA	NA	Saccharum officinarum	PUT-157a-Saccharum_officinarum-55882	184	Phenylalanine ammonia-lyase
NA	NA	Saccharum officinarum	PUT-157a-Saccharum_officinarum-48145	185	Phenylalanine ammonia-lyase
NA	NA	Saccharum officinarum	PUT-157a-Saccharum_officinarum-112841	185	Phenylalanine ammonia-lyase
NA	NA	Saccharum officinarum	PUT-157a-Saccharum_officinarum-89795	186	Phenylalanine ammonia-lyase
NA	NA	Saccharum officinarum	PUT-157a-Saccharum_officinarum-55901	186	Phenylalanine ammonia-lyase
NA	NA	Saccharum officinarum	PUT-157a-Saccharum_officinarum-55903	187	Phenylalanine ammonia-lyase
NA	NA	Saccharum officinarum	PUT-157a-Saccharum_officinarum-49685	188	Phenylalanine ammonia-lyase
NA	NA	Saccharum officinarum	PUT-157a-Saccharum_officinarum-55895	189	Phenylalanine ammonia-lyase
NA	NA	Saccharum officinarum	PUT-157a-Saccharum_officinarum-55902	189	Phenylalanine ammonia-lyase
NA	NA	Saccharum officinarum	PUT-157a-Saccharum_officinarum-81653	189	Phenylalanine ammonia-lyase
NA	NA	Saccharum officinarum	PUT-157a-Saccharum_officinarum-55905	191	Phenylalanine ammonia-lyase
NA	NA	Saccharum officinarum	PUT-157a-Saccharum_officinarum-752133725	192	Phenylalanine ammonia-lyase
NA	NA	Saccharum officinarum	PUT-157a-Saccharum_officinarum-55934	193	Phenylalanine ammonia-lyase
NA	NA	Saccharum officinarum	PUT-157a-Saccharum_officinarum-76280	194	Phenylalanine ammonia-lyase
NA	NA	Saccharum officinarum	PUT-157a-Saccharum_officinarum-55917	194	Phenylalanine ammonia-lyase
NA	NA	Saccharum officinarum	PUT-157a-Saccharum_officinarum-99658	194	Phenylalanine ammonia-lyase
NA	NA	Saccharum officinarum	PUT-157a-Saccharum_officinarum-47268	194	Phenylalanine ammonia-lyase
NA	NA	Saccharum officinarum	PUT-157a-Saccharum_officinarum-87595	196	Phenylalanine ammonia-lyase
NA	NA	Saccharum officinarum	PUT-157a-Saccharum_officinarum-55887	196	Phenylalanine ammonia-lyase
NA	NA	Saccharum officinarum	PUT-157a-Saccharum_officinarum-55923	197	Phenylalanine ammonia-lyase
NA	NA	Saccharum officinarum	PUT-157a-Saccharum_officinarum-53132	198	Phenylalanine ammonia-lyase
NA	NA	Saccharum officinarum	PUT-157a-Saccharum_officinarum-21713	200	Phenylalanine ammonia-lyase
NA	NA	Saccharum officinarum	PUT-157a-Saccharum_officinarum-118935	200	Phenylalanine ammonia-lyase
NA	NA	Saccharum officinarum	PUT-157a-Saccharum_officinarum-53122	201	Phenylalanine ammonia-lyase
NA	NA	Saccharum officinarum	PUT-157a-Saccharum_officinarum-53100	203	Phenylalanine ammonia-lyase
NA	NA	Saccharum officinarum	PUT-157a-Saccharum_officinarum-75388	203	Phenylalanine ammonia-lyase
NA	NA	Saccharum officinarum	PUT-157a-Saccharum_officinarum-53107	203	Phenylalanine ammonia-lyase
NA	NA	Saccharum officinarum	PUT-157a-Saccharum_officinarum-24190	206	Phenylalanine ammonia-lyase
NA	NA	Saccharum officinarum	PUT-157a-Saccharum_officinarum-55937	207	Phenylalanine ammonia-lyase
NA	NA	Saccharum officinarum	PUT-157a-Saccharum_officinarum-53111	208	Phenylalanine ammonia-lyase
NA	NA	Saccharum officinarum	PUT-157a-Saccharum_officinarum-55908	210	Phenylalanine ammonia-lyase
NA	NA	Saccharum officinarum	PUT-157a-Saccharum_officinarum-55900	213	Phenylalanine ammonia-lyase
NA	NA	Saccharum officinarum	PUT-157a-Saccharum_officinarum-55918	214	Phenylalanine ammonia-lyase
NA	NA	Saccharum officinarum	PUT-157a-Saccharum_officinarum-114151	218	Phenylalanine ammonia-lyase
NA	NA	Saccharum officinarum	PUT-157a-Saccharum_officinarum-61100	219	Phenylalanine ammonia-lyase
NA	NA	Saccharum officinarum	PUT-157a-Saccharum_officinarum-53135	220	Phenylalanine ammonia-lyase
NA	NA	Saccharum officinarum	PUT-157a-Saccharum_officinarum-544133733	222	Phenylalanine ammonia-lyase
NA	NA	Saccharum officinarum	PUT-157a-Saccharum_officinarum-102720	223	Phenylalanine ammonia-lyase
NA	NA	Saccharum officinarum	PUT-157a-Saccharum_officinarum-386133732	223	Phenylalanine ammonia-lyase
NA	NA	Saccharum officinarum	PUT-157a-Saccharum_officinarum-53114	226	Phenylalanine ammonia-lyase
NA	NA	Saccharum officinarum	PUT-157a-Saccharum_officinarum-55876	226	Phenylalanine ammonia-lyase
NA	NA	Saccharum officinarum	PUT-157a-Saccharum_officinarum-25868	228	Phenylalanine ammonia-lyase
NA	NA	Saccharum officinarum	PUT-157a-Saccharum_officinarum-53108	230	Phenylalanine ammonia-lyase
NA	NA	Saccharum officinarum	PUT-157a-Saccharum_officinarum-55875	230	Phenylalanine ammonia-lyase
NA	NA	Saccharum officinarum	PUT-157a-Saccharum_officinarum-55912	230	Phenylalanine ammonia-lyase
NA	NA	Saccharum officinarum	PUT-157a-Saccharum_officinarum-55941	231	Phenylalanine ammonia-lyase
NA	NA	Saccharum officinarum	PUT-157a-Saccharum_officinarum-53126	235	Phenylalanine ammonia-lyase
NA	NA	Saccharum officinarum	PUT-157a-Saccharum_officinarum-53125	237	Phenylalanine ammonia-lyase
NA	NA	Saccharum officinarum	PUT-157a-Saccharum_officinarum-14133732	239	Phenylalanine ammonia-lyase
NA	NA	Saccharum officinarum	PUT-157a-Saccharum_officinarum-55916	239	Phenylalanine ammonia-lyase
NA	NA	Saccharum officinarum	PUT-157a-Saccharum_officinarum-55896	240	Phenylalanine ammonia-lyase
NA	NA	Saccharum officinarum	PUT-157a-Saccharum_officinarum-55943	240	Phenylalanine ammonia-lyase
NA	NA	Saccharum officinarum	PUT-157a-Saccharum_officinarum-70297	242	Phenylalanine ammonia-lyase
NA	NA	Saccharum officinarum	PUT-157a-Saccharum_officinarum-53105	243	Phenylalanine ammonia-lyase
NA	NA	Saccharum officinarum	PUT-157a-Saccharum_officinarum-752133726	245	Phenylalanine ammonia-lyase
NA	NA	Saccharum officinarum	PUT-157a-Saccharum_officinarum-31513	247	Phenylalanine ammonia-lyase
NA	NA	Saccharum officinarum	PUT-157a-Saccharum_officinarum-53106	250	Phenylalanine ammonia-lyase
NA	NA	Saccharum officinarum	PUT-157a-Saccharum_officinarum-55924	250	Phenylalanine ammonia-lyase
NA	NA	Saccharum officinarum	PUT-157a-Saccharum_officinarum-53136	253	Phenylalanine ammonia-lyase
NA	NA	Saccharum officinarum	PUT-157a-Saccharum_officinarum-53133	254	Phenylalanine ammonia-lyase
NA	NA	Saccharum officinarum	PUT-157a-Saccharum_officinarum-55920	254	Phenylalanine ammonia-lyase
NA	NA	Saccharum officinarum	PUT-157a-Saccharum_officinarum-53134	260	Phenylalanine ammonia-lyase
NA	NA	Saccharum officinarum	PUT-157a-Saccharum_officinarum-55878	261	Phenylalanine ammonia-lyase
NA	NA	Saccharum officinarum	PUT-157a-Saccharum_officinarum-55933	263	Phenylalanine ammonia-lyase
NA	NA	Saccharum officinarum	PUT-157a-Saccharum_officinarum-53110	263	Phenylalanine ammonia-lyase
NA	NA	Saccharum officinarum	PUT-157a-Saccharum_officinarum-53109	269	Phenylalanine ammonia-lyase
NA	NA	Saccharum officinarum	PUT-157a-Saccharum_officinarum-128749	270	Phenylalanine ammonia-lyase
NA	NA	Saccharum officinarum	PUT-157a-Saccharum_officinarum-53138	283	Phenylalanine ammonia-lyase
NA	NA	Saccharum officinarum	PUT-157a-Saccharum_officinarum-53118	309	Phenylalanine ammonia-lyase
NA	NA	Saccharum officinarum	PUT-157a-Saccharum_officinarum-53140	314	Phenylalanine ammonia-lyase
NA	NA	Saccharum officinarum	PUT-157a-Saccharum_officinarum-22167	346	Phenylalanine ammonia-lyase
NA	NA	Saccharum officinarum	PUT-157a-Saccharum_officinarum-55939	354	Phenylalanine ammonia-lyase
NA	NA	Sorghum propinquum	PUT-157a-Sorghum_propinquum-6641	136	Phenylalanine ammonia-lyase
NA	NA	Sorghum propinquum	PUT-157a-Sorghum_propinquum-9305	209	Phenylalanine ammonia-lyase
NA	NA	Triticum aestivum	PUT-163b-Triticum_aestivum-45894	45	Phenylalanine ammonia-lyase
NA	NA	Triticum aestivum	PUT-163c-Triticum_aestivum-2121	45	Phenylalanine ammonia-lyase
NA	NA	Triticum aestivum	PUT-163b-Triticum_aestivum-64943	48	Phenylalanine ammonia-lyase
NA	NA	Triticum aestivum	PUT-163c-Triticum_aestivum-8287	58	Phenylalanine ammonia-lyase
NA	NA	Triticum aestivum	PUT-163b-Triticum_aestivum-91916	64	Phenylalanine ammonia-lyase
NA	NA	Triticum aestivum	PUT-163b-Triticum_aestivum-1368165444	68	Phenylalanine ammonia-lyase
NA	NA	Triticum aestivum	PUT-163c-Triticum_aestivum-16553	73	Phenylalanine ammonia-lyase
NA	NA	Triticum aestivum	PUT-163c-Triticum_aestivum-2115	74	Phenylalanine ammonia-lyase
NA	NA	Triticum aestivum	PUT-163b-Triticum_aestivum-3184165446	90	Phenylalanine ammonia-lyase
NA	NA	Triticum aestivum	PUT-163b-Triticum_aestivum-3288165443	96	Phenylalanine ammonia-lyase
NA	NA	Triticum aestivum	PUT-163b-Triticum_aestivum-44582	96	Phenylalanine ammonia-lyase
NA	NA	Triticum aestivum	PUT-163c-Triticum_aestivum-16552	100	Phenylalanine ammonia-lyase
NA	NA	Triticum aestivum	PUT-163c-Triticum_aestivum-25939	100	Phenylalanine ammonia-lyase
NA	NA	Triticum aestivum	PUT-163b-Triticum_aestivum-3184165447	102	phenylalanine ammonia-lyase
NA	NA	Triticum aestivum	PUT-163c-Triticum_aestivum-8321	102	Phenylalanine ammonia-lyase
NA	NA	Triticum aestivum	PUT-163c-Triticum_aestivum-16554	103	Phenylalanine ammonia-lyase
NA	NA	Triticum aestivum	PUT-163b-Triticum_aestivum-64746	103	Phenylalanine ammonia-lyase
NA	NA	Triticum aestivum	PUT-163c-Triticum_aestivum-2119	108	Phenylalanine ammonia-lyase
NA	NA	Triticum aestivum	PUT-163c-Triticum_aestivum-2122	109	phenylalanine ammonia-lyase
NA	NA	Triticum aestivum	PUT-163b-Triticum_aestivum-3459165447	111	Phenylalanine ammonia-lyase
NA	NA	Triticum aestivum	PUT-163b-Triticum_aestivum-72172	124	Phenylalanine ammonia-lyase
NA	NA	Triticum aestivum	PUT-163b-Triticum_aestivum-107481	125	phenylalanine ammonia-lyase
NA	NA	Triticum aestivum	PUT-163c-Triticum_aestivum-7088	128	Phenylalanine ammonia-lyase
NA	NA	Triticum aestivum	PUT-163b-Triticum_aestivum-2155165443	128	Phenylalanine ammonia-lyase
NA	NA	Triticum aestivum	PUT-163b-Triticum_aestivum-151494	130	phenylalanine ammonia-lyase
NA	NA	Triticum aestivum	PUT-163b-Triticum_aestivum-30502	131	Phenylalanine ammonia-lyase
NA	NA	Triticum aestivum	PUT-163b-Triticum_aestivum-53279	132	Phenylalanine ammonia-lyase
NA	NA	Triticum aestivum	PUT-163c-Triticum_aestivum-16551	134	Phenylalanine ammonia-lyase
NA	NA	Triticum aestivum	PUT-163c-Triticum_aestivum-8346	135	phenylalanine ammonia-lyase
NA	NA	Triticum aestivum	PUT-163b-Triticum_aestivum-2857165447	139	Phenylalanine ammonia-lyase
NA	NA	Triticum aestivum	PUT-163b-Triticum_aestivum-443165443	142	Phenylalanine ammonia-lyase
NA	NA	Triticum aestivum	PUT-163b-Triticum_aestivum-50488	143	Phenylalanine ammonia-lyase
NA	NA	Triticum aestivum	PUT-163b-Triticum_aestivum-136933	145	phenylalanine ammonia-lyase
NA	NA	Triticum aestivum	PUT-163b-Triticum_aestivum-73549	146	Phenylalanine ammonia-lyase
NA	NA	Triticum aestivum	PUT-163c-Triticum_aestivum-8316	146	Phenylalanine ammonia-lyase
NA	NA	Triticum aestivum	PUT-163b-Triticum_aestivum-36354	151	Phenylalanine ammonia-lyase
NA	NA	Triticum aestivum	PUT-163b-Triticum_aestivum-3001165444	152	Phenylalanine ammonia-lyase
NA	NA	Triticum aestivum	PUT-163b-Triticum_aestivum-72171	153	Phenylalanine ammonia-lyase
NA	NA	Triticum aestivum	PUT-163b-Triticum_aestivum-73543	153	Phenylalanine ammonia-lyase
NA	NA	Triticum aestivum	PUT-163b-Triticum_aestivum-10785	156	Phenylalanine ammonia-lyase
NA	NA	Triticum aestivum	PUT-163b-Triticum_aestivum-72181	162	Phenylalanine ammonia-lyase
NA	NA	Triticum aestivum	PUT-163c-Triticum_aestivum-8317	165	Phenylalanine ammonia-lyase
NA	NA	Triticum aestivum	PUT-163b-Triticum_aestivum-151489	166	Phenylalanine ammonia-lyase
NA	NA	Triticum aestivum	PUT-163c-Triticum_aestivum-7085	168	phenylalanine ammonia-lyase
NA	NA	Triticum aestivum	PUT-163b-Triticum_aestivum-31304	169	Phenylalanine ammonia-lyase
NA	NA	Triticum aestivum	PUT-163b-Triticum_aestivum-51820	175	Phenylalanine ammonia-lyase
NA	NA	Triticum aestivum	PUT-163b-Triticum_aestivum-73548	176	Phenylalanine ammonia-lyase
NA	NA	Triticum aestivum	PUT-163b-Triticum_aestivum-3288165442	177	Phenylalanine ammonia-lyase
NA	NA	Triticum aestivum	PUT-163b-Triticum_aestivum-1234165443	177	Phenylalanine ammonia-lyase
NA	NA	Triticum aestivum	PUT-163b-Triticum_aestivum-73014	177	Phenylalanine ammonia-lyase
NA	NA	Triticum aestivum	PUT-163b-Triticum_aestivum-83682	178	Phenylalanine ammonia-lyase
NA	NA	Triticum aestivum	PUT-163c-Triticum_aestivum-8195	183	Phenylalanine ammonia-lyase
NA	NA	Triticum aestivum	PUT-163c-Triticum_aestivum-8351	184	Phenylalanine ammonia-lyase
NA	NA	Triticum aestivum	PUT-163b-Triticum_aestivum-42787	184	Phenylalanine ammonia-lyase
NA	NA	Triticum aestivum	PUT-163c-Triticum_aestivum-16550	186	Phenylalanine ammonia-lyase
NA	NA	Triticum aestivum	PUT-163b-Triticum_aestivum-51769	187	Phenylalanine ammonia-lyase
NA	NA	Triticum aestivum	PUT-163c-Triticum_aestivum-8349	187	Phenylalanine ammonia-lyase
NA	NA	Triticum aestivum	PUT-163c-Triticum_aestivum-2021	194	Phenylalanine ammonia-lyase
NA	NA	Triticum aestivum	PUT-163c-Triticum_aestivum-2016	195	phenylalanine ammonia-lyase
NA	NA	Triticum aestivum	PUT-163c-Triticum_aestivum-8347	199	Phenylalanine ammonia-lyase
NA	NA	Triticum aestivum	PUT-163b-Triticum_aestivum-73547	199	Phenylalanine ammonia-lyase
NA	NA	Triticum aestivum	PUT-163b-Triticum_aestivum-82652	200	Phenylalanine ammonia-lyase
NA	NA	Triticum aestivum	PUT-163b-Triticum_aestivum-51821	202	Phenylalanine ammonia-lyase
NA	NA	Triticum aestivum	PUT-163b-Triticum_aestivum-150271	202	Phenylalanine ammonia-lyase
NA	NA	Triticum aestivum	PUT-163b-Triticum_aestivum-110979	202	Phenylalanine ammonia-lyase
NA	NA	Triticum aestivum	PUT-163b-Triticum_aestivum-71310	202	Phenylalanine ammonia-lyase
NA	NA	Triticum aestivum	PUT-163b-Triticum_aestivum-73538	203	Phenylalanine ammonia-lyase
NA	NA	Triticum aestivum	PUT-163c-Triticum_aestivum-8326	207	Phenylalanine ammonia-lyase
NA	NA	Triticum aestivum	PUT-163b-Triticum_aestivum-2011	208	Phenylalanine ammonia-lyase
NA	NA	Triticum aestivum	PUT-163c-Triticum_aestivum-7059	211	Phenylalanine ammonia-lyase
NA	NA	Triticum aestivum	PUT-163b-Triticum_aestivum-133783	211	Phenylalanine ammonia-lyase
NA	NA	Triticum aestivum	PUT-163c-Triticum_aestivum-2116	212	Phenylalanine ammonia-lyase
NA	NA	Triticum aestivum	PUT-163b-Triticum_aestivum-3288165444	215	Phenylalanine ammonia-lyase
NA	NA	Triticum aestivum	PUT-163c-Triticum_aestivum-8348	216	Phenylalanine ammonia-lyase
NA	NA	Triticum aestivum	PUT-163b-Triticum_aestivum-3460165449	218	Phenylalanine ammonia-lyase
NA	NA	Triticum aestivum	PUT-163b-Triticum_aestivum-56652	220	Phenylalanine ammonia-lyase
NA	NA	Triticum aestivum	PUT-163b-Triticum_aestivum-3224165445	222	Phenylalanine ammonia-lyase
NA	NA	Triticum aestivum	PUT-163c-Triticum_aestivum-7060	223	Phenylalanine ammonia-lyase
NA	NA	Triticum aestivum	PUT-163b-Triticum_aestivum-134214	225	Phenylalanine ammonia-lyase
NA	NA	Triticum aestivum	PUT-163b-Triticum_aestivum-3288165441	228	phenylalanine ammonia-lyase
NA	NA	Triticum aestivum	PUT-163b-Triticum_aestivum-72724	229	Phenylalanine ammonia-lyase
NA	NA	Triticum aestivum	PUT-163b-Triticum_aestivum-3224165444	232	Phenylalanine ammonia-lyase
NA	NA	Triticum aestivum	PUT-163b-Triticum_aestivum-3086165441	234	Phenylalanine ammonia-lyase
NA	NA	Triticum aestivum	PUT-163c-Triticum_aestivum-2114	234	Phenylalanine ammonia-lyase
NA	NA	Triticum aestivum	PUT-163c-Triticum_aestivum-8324	235	phenylalanine ammonia-lyase
NA	NA	Triticum aestivum	PUT-163b-Triticum_aestivum-3288165445	236	Phenylalanine ammonia-lyase
NA	NA	Triticum aestivum	PUT-163c-Triticum_aestivum-7057	237	Phenylalanine ammonia-lyase
NA	NA	Triticum aestivum	PUT-163c-Triticum_aestivum-8350	239	Phenylalanine ammonia-lyase
NA	NA	Triticum aestivum	PUT-163b-Triticum_aestivum-73539	240	Phenylalanine ammonia-lyase
NA	NA	Triticum aestivum	PUT-163b-Triticum_aestivum-11274	242	Phenylalanine ammonia-lyase
NA	NA	Triticum aestivum	PUT-163c-Triticum_aestivum-2020	246	Phenylalanine ammonia-lyase
NA	NA	Triticum aestivum	PUT-163b-Triticum_aestivum-69779	247	Phenylalanine ammonia-lyase
NA	NA	Triticum aestivum	PUT-163c-Triticum_aestivum-8328	249	Phenylalanine ammonia-lyase
NA	NA	Triticum aestivum	PUT-163b-Triticum_aestivum-3086165444	252	Phenylalanine ammonia-lyase
NA	NA	Triticum aestivum	PUT-163c-Triticum_aestivum-8329	253	Phenylalanine ammonia-lyase
NA	NA	Triticum aestivum	PUT-163b-Triticum_aestivum-108053	253	Phenylalanine ammonia-lyase
NA	NA	Triticum aestivum	PUT-163c-Triticum_aestivum-2123	254	phenylalanine ammonia-lyase
NA	NA	Triticum aestivum	PUT-163b-Triticum_aestivum-3287165448	257	Phenylalanine ammonia-lyase
NA	NA	Triticum aestivum	PUT-163b-Triticum_aestivum-3086165446	259	Phenylalanine ammonia-lyase
NA	NA	Triticum aestivum	PUT-163c-Triticum_aestivum-2023	263	Phenylalanine ammonia-lyase
NA	NA	Triticum aestivum	PUT-163c-Triticum_aestivum-2019	266	Phenylalanine ammonia-lyase
NA	NA	Triticum aestivum	PUT-163c-Triticum_aestivum-8322	269	Phenylalanine ammonia-lyase
NA	NA	Triticum aestivum	PUT-163c-Triticum_aestivum-7058	272	Phenylalanine ammonia-lyase
NA	NA	Triticum aestivum	PUT-163b-Triticum_aestivum-130532	280	Phenylalanine ammonia-lyase
NA	NA	Triticum aestivum	PUT-163b-Triticum_aestivum-74814	305	Phenylalanine ammonia-lyase
NA	NA	Triticum aestivum	PUT-163b-Triticum_aestivum-18192	314	Phenylalanine ammonia-lyase
NA	NA	Triticum aestivum	PUT-163c-Triticum_aestivum-8320	317	Phenylalanine ammonia-lyase
NA	NA	Triticum aestivum	PUT-163b-Triticum_aestivum-14947	324	Phenylalanine ammonia-lyase
NA	NA	Triticum aestivum	PUT-163c-Triticum_aestivum-8330	343	Phenylalanine ammonia-lyase
NA	NA	Triticum aestivum	PUT-163b-Triticum_aestivum-73552	350	Phenylalanine ammonia-lyase
NA	NA	Triticum aestivum	PUT-163b-Triticum_aestivum-2857165445	374	Phenylalanine ammonia-lyase
NA	NA	Triticum aestivum	PUT-163b-Triticum_aestivum-76461	379	Phenylalanine ammonia-lyase
NA	NA	Triticum aestivum	PUT-163c-Triticum_aestivum-8331	388	Phenylalanine ammonia-lyase
NA	NA	Triticum aestivum	PUT-163b-Triticum_aestivum-3287165449	391	phenylalanine ammonia-lyase
NA	NA	Triticum aestivum	PUT-163c-Triticum_aestivum-7087	391	Phenylalanine ammonia-lyase
NA	NA	Triticum aestivum	PUT-163b-Triticum_aestivum-110323	394	Phenylalanine ammonia-lyase
NA	NA	Triticum aestivum	PUT-163b-Triticum_aestivum-2857165446	407	Phenylalanine ammonia-lyase
NA	NA	Triticum aestivum	PUT-163b-Triticum_aestivum-3459165449	425	Phenylalanine ammonia-lyase
NA	NA	Triticum aestivum	PUT-163c-Triticum_aestivum-8286	429	Phenylalanine ammonia-lyase
NA	NA	Triticum aestivum	PUT-163b-Triticum_aestivum-3000165442	430	Phenylalanine ammonia-lyase
NA	NA	Triticum aestivum	PUT-163b-Triticum_aestivum-3287165447	469	Phenylalanine ammonia-lyase
NA	NA	Triticum aestivum	PUT-163b-Triticum_aestivum-14944	540	Phenylalanine ammonia-lyase
NA	NA	Triticum monococcum	PUT-157a-Triticum_monococcum-277	110	Phenylalanine ammonia-lyase
NA	NA	Triticum turgidum subsp durum	PUT-169a-Triticum_turgidum_subsp__durum-1961	95	phenylalanine ammonia-lyase
NA	NA	Triticum turgidum subsp durum	PUT-169a-Triticum_turgidum_subsp__durum-8508	106	Phenylalanine ammonia-lyase
NA	NA	Triticum turgidum subsp durum	PUT-169a-Triticum_turgidum_subsp__durum-8423	117	Phenylalanine ammonia-lyase
NA	NA	Triticum turgidum subsp durum	PUT-169a-Triticum_turgidum_subsp__durum-5434	141	Phenylalanine ammonia-lyase
NA	NA	Triticum turgidum subsp durum	PUT-169a-Triticum_turgidum_subsp__durum-2274	168	Phenylalanine ammonia-lyase
NA	NA	Vitis vinifera	GSVIVT00015140001	175	Phenylalanine ammonia-lyase
NA	NA	Vitis vinifera	GSVIVT00015123001	356	Phenylalanine ammonia-lyase
NA	NA	Vitis vinifera	GSVIVT00024293001	441	Phenylalanine ammonia-lyase
NA	NA	Zea mays	GRMZM2G029048_P03	138	Phenylalanine ammonia-lyase
NA	NA	Zea mays	GRMZM2G153871_P01	416	Phenylalanine ammonia-lyase
NA	NA	Zea mays	GRMZM2G441347_P02	557	Phenylalanine ammonia-lyase
1Protein sequences from A. thaliana, P. trichocarpa and V. vinifera were included in the monocot orthologous group analysis.
